# Supplementary material for: Suppression of Fusarium Wilt in Watermelon by Bacillus amyloliquefaciens DHA55 through Extracellular Production of Antifungal Lipopeptides
Source: MDPI journal article supplement (doi:10.3390/jof9030336), 2023-03-09
Supplement: s1 [file s1]

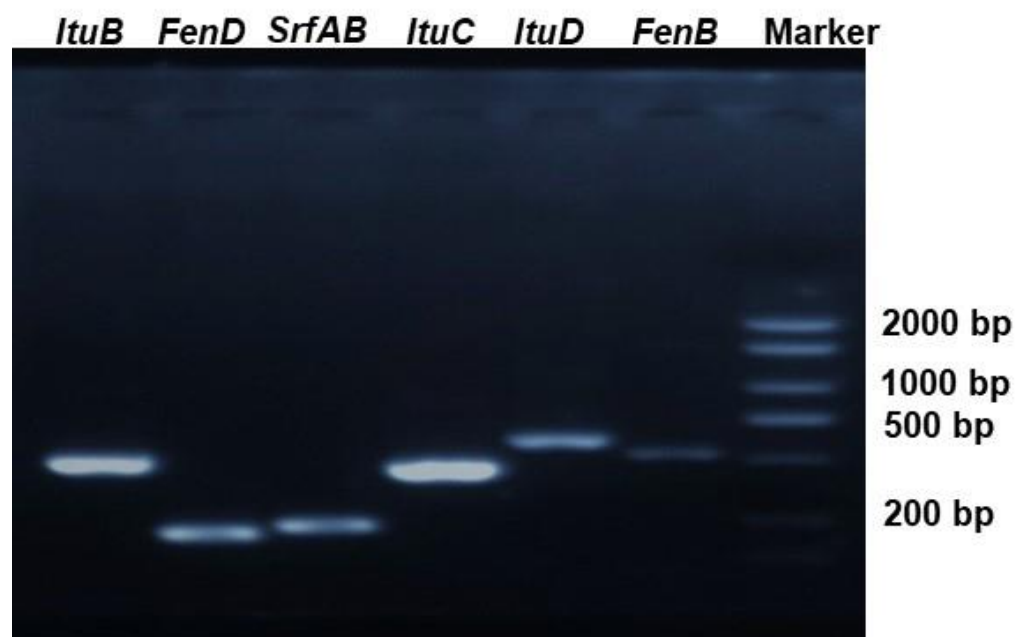

**Figure S1.** Detection of the lipopeptide biosynthesis genes from *Bacillus amyloliquefaciens* DHA55. Lane 1, *ItuB*; Lane 2, *FenD*; Lane 3, *SrfAB*; Lane 4, *ituC*; Lane 5, *ituD*; Lane 6, *FenB*; and DL, 2000 DNA marker.
